# Supplementary material
Source: MDPI journal article supplement (https://www.mdpi.com/2076-3417/14/5/1864)
Supplement: s1 [file s1]

## Supplementary material

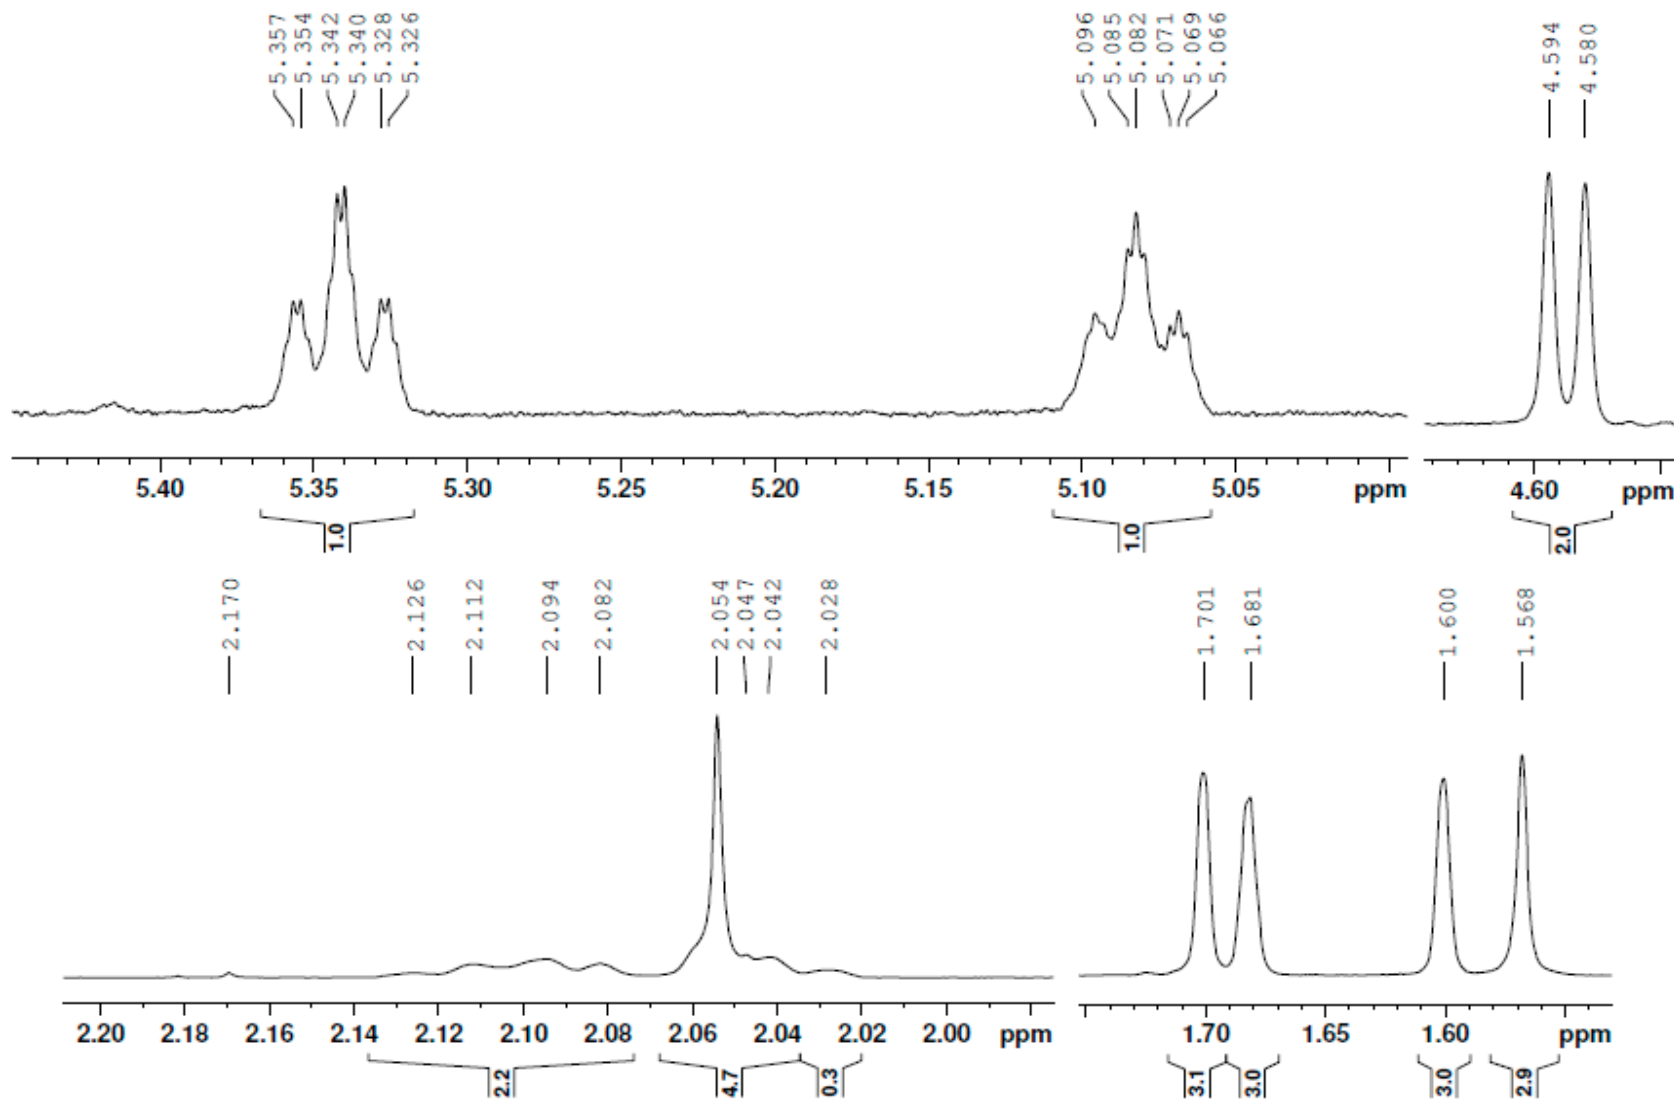

**Figure S1.**  $^1\text{H}$  NMR (400 MHz) spectrum of Geranyl acetate in  $\text{CDCl}_3$

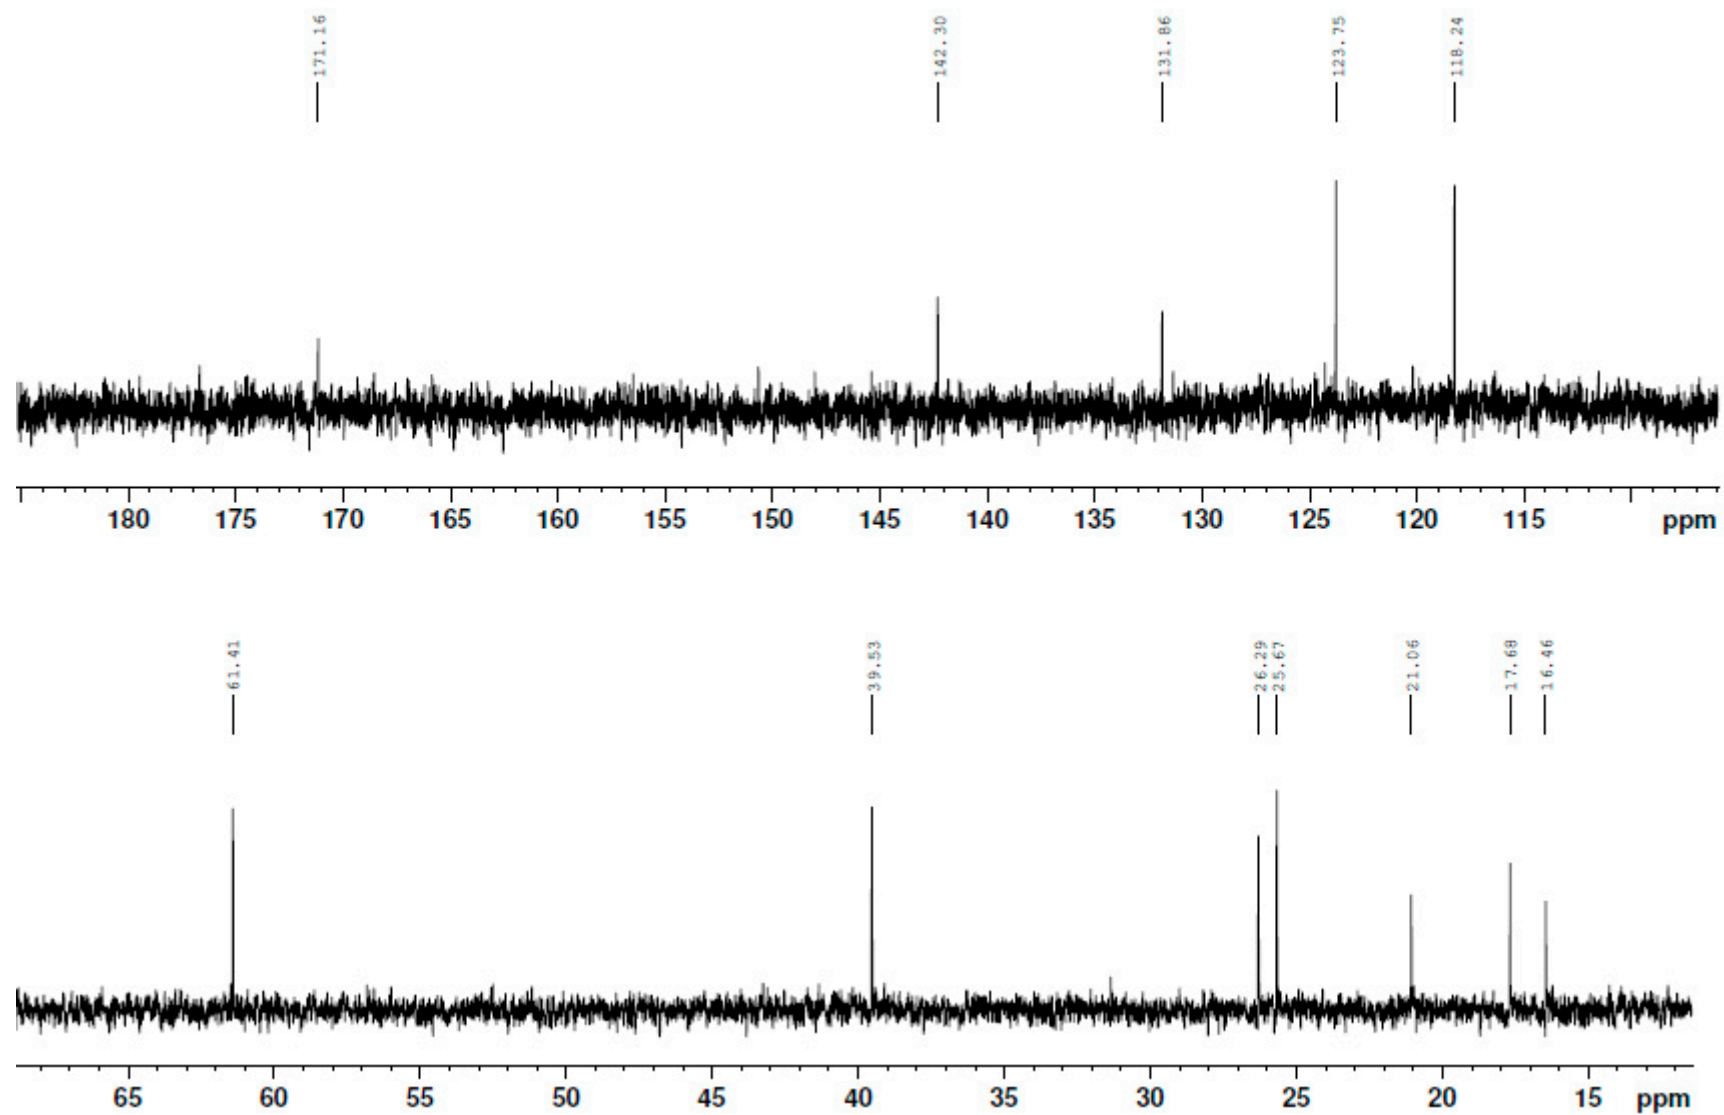

**Figure S2.**  $^{13}\text{C}$  NMR (100 MHz) spectrum of Geranyl acetate in  $\text{CDCl}_3$ .
